# Supplementary material
Source: PubMed Central journal article supplement (PMC3023514)

Supplementary Figure 1

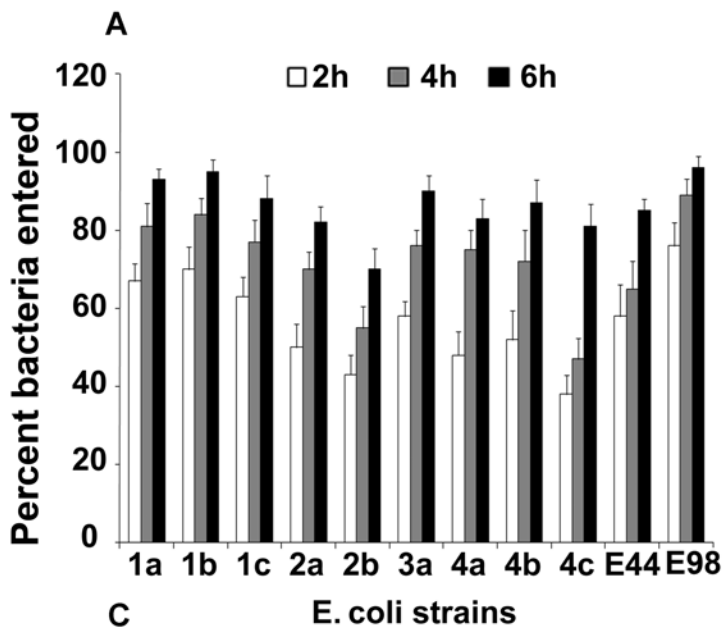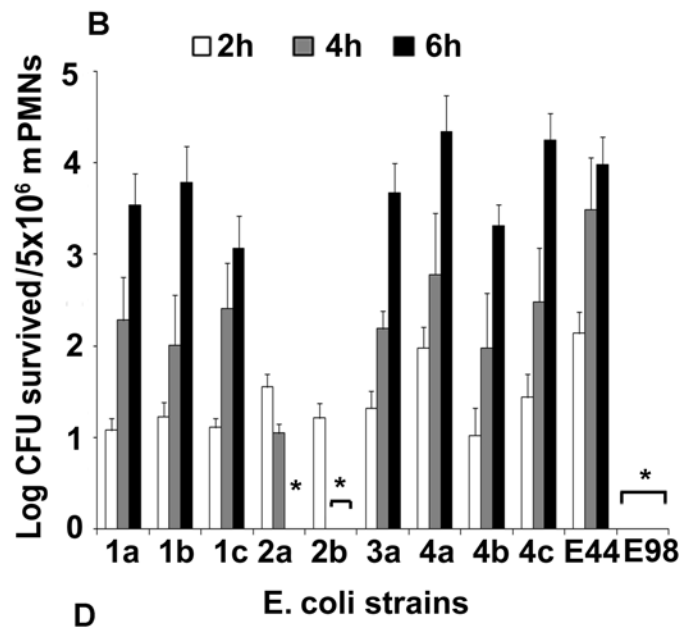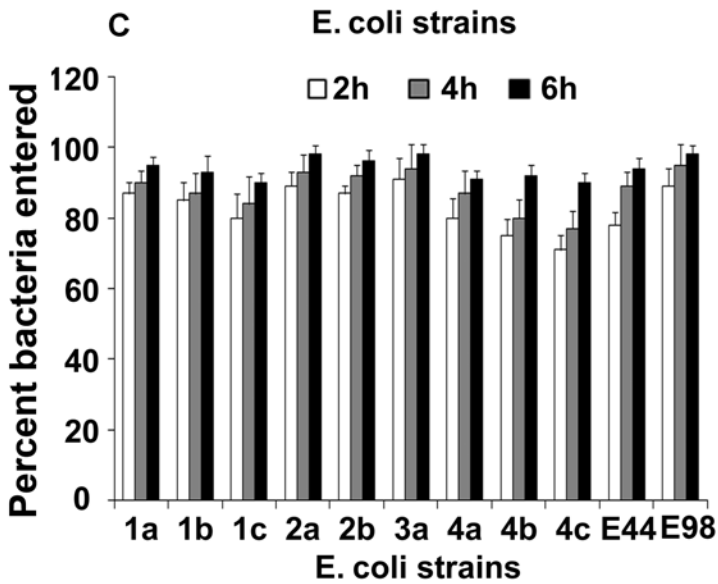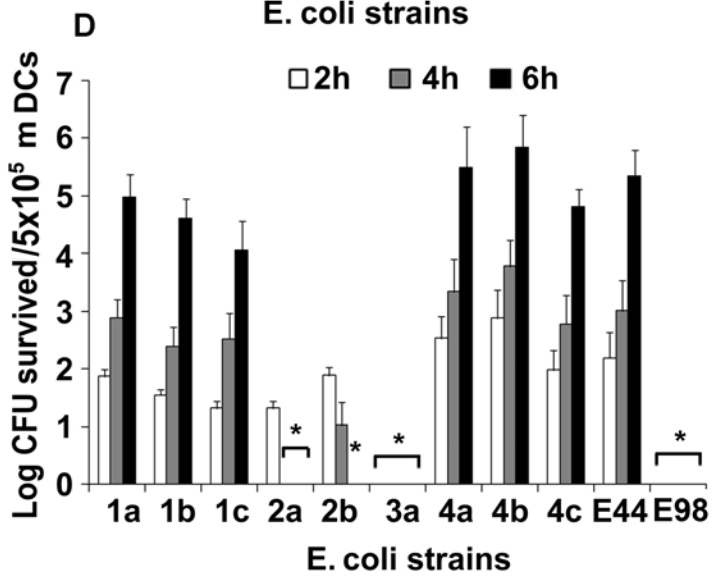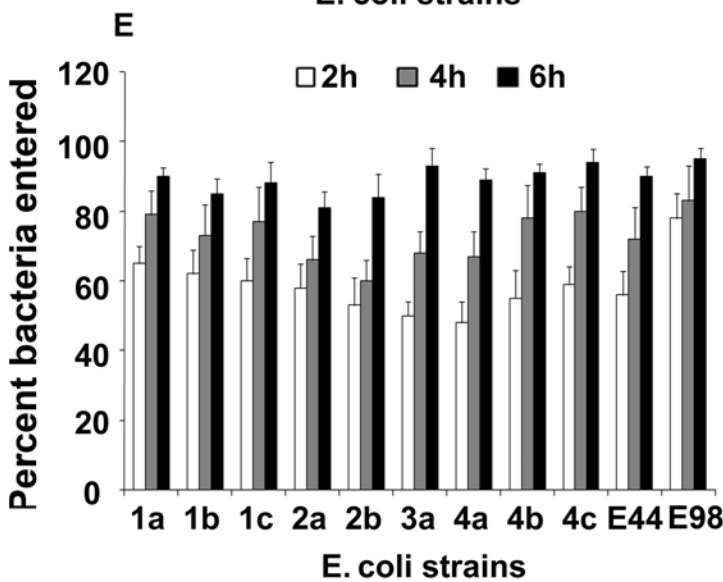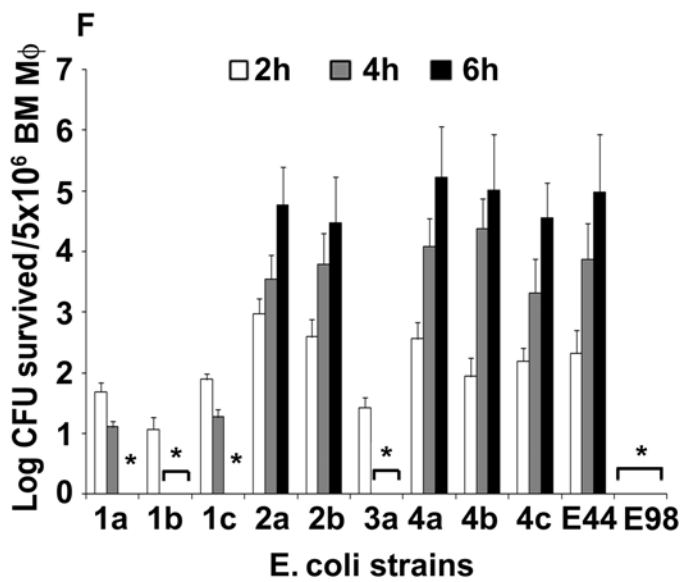

Supplement: supp_M110.178236_jbc.M110.178236-1.pdf [file supp_M110.178236_jbc.M110.178236-1.pdf]

Supplementary Figure 2

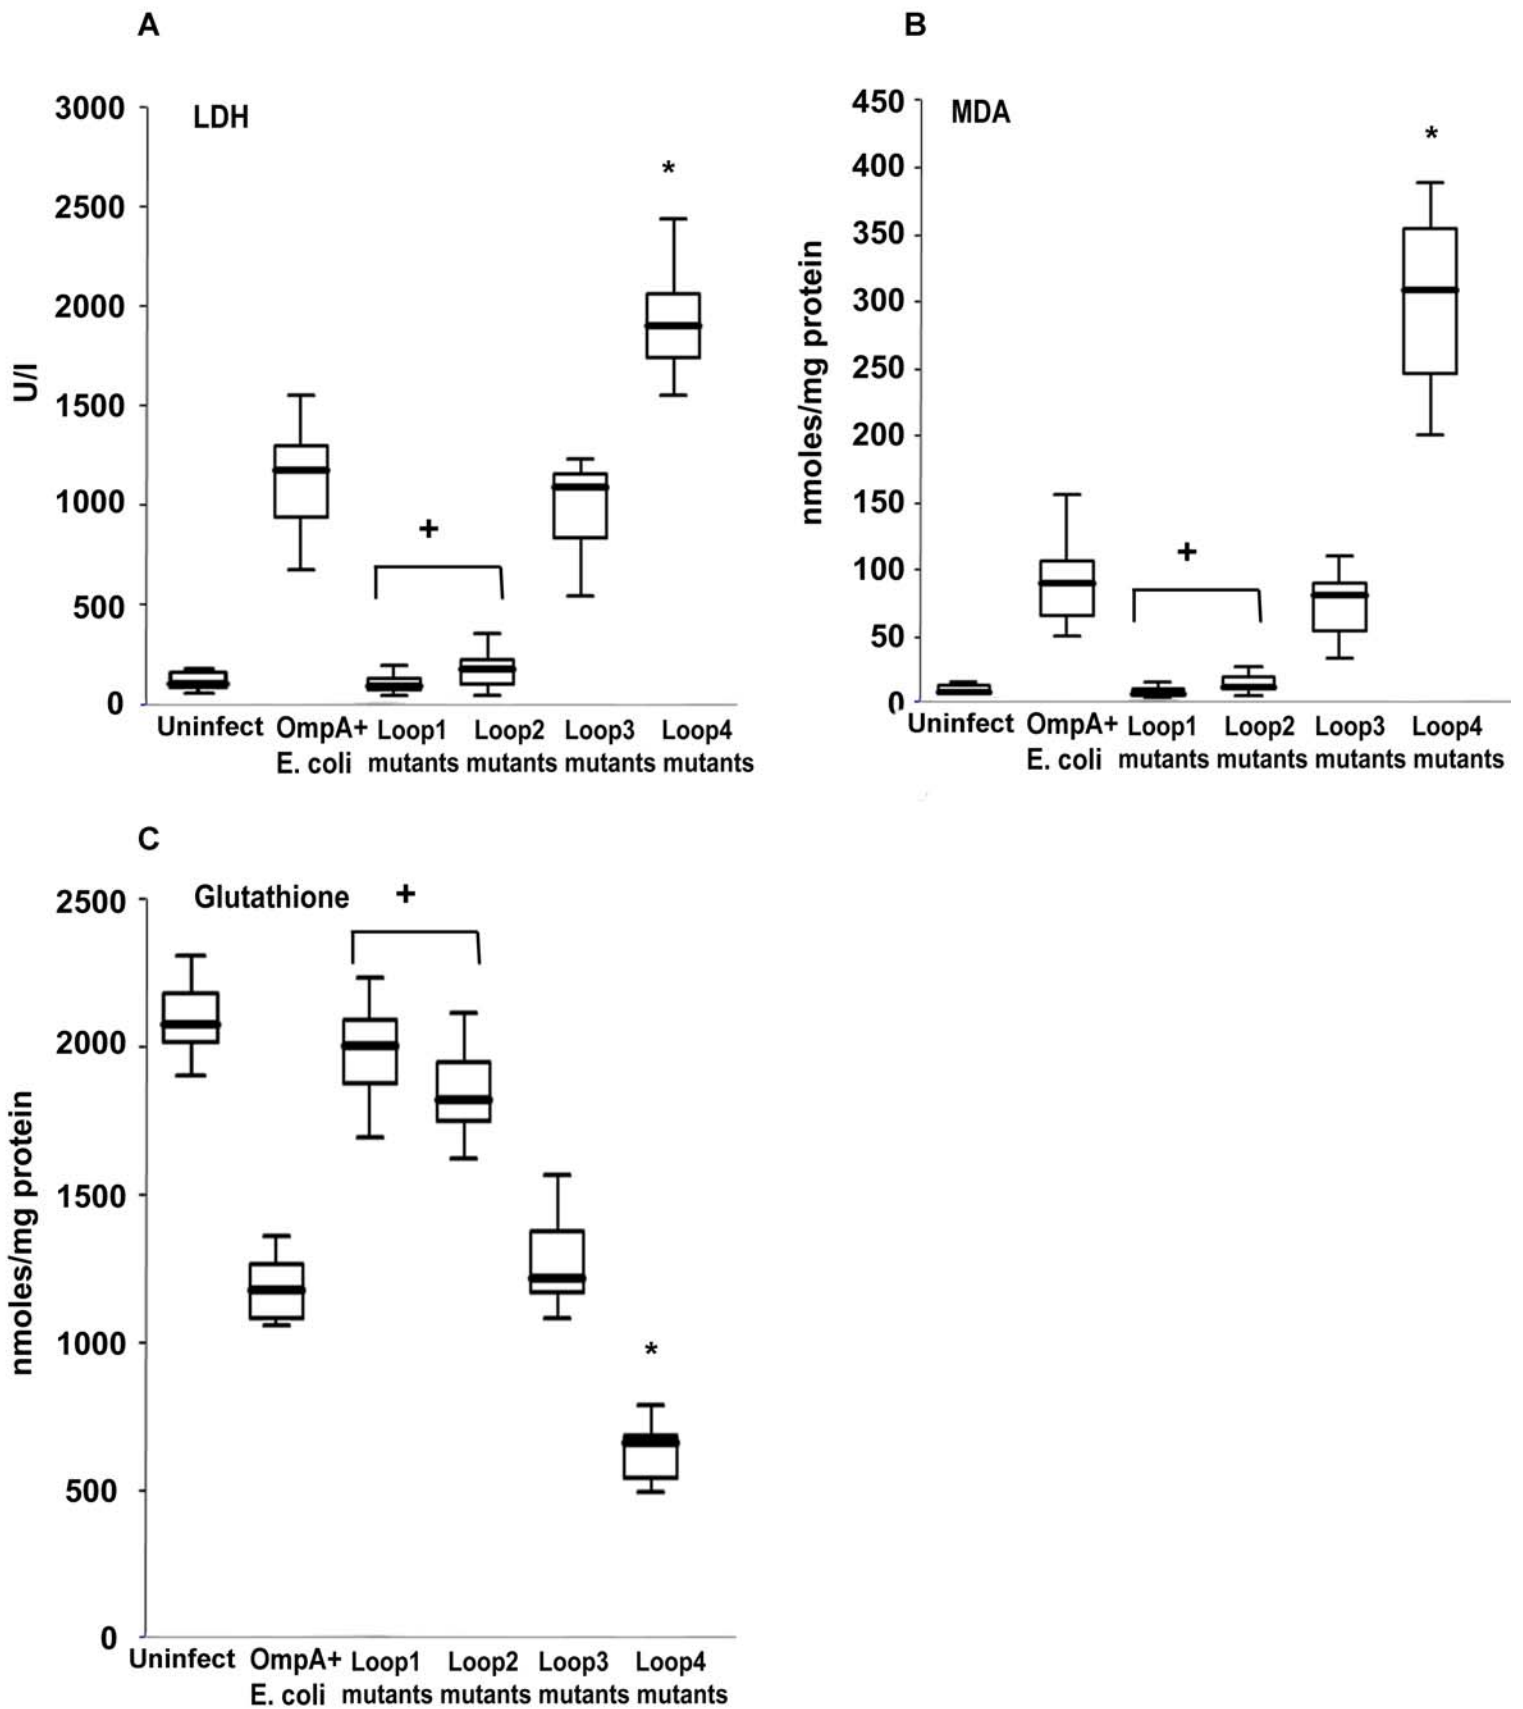

Supplement: supp_M110.178236_jbc.M110.178236-2.pdf [file supp_M110.178236_jbc.M110.178236-2.pdf]

Supplementary Figure 3

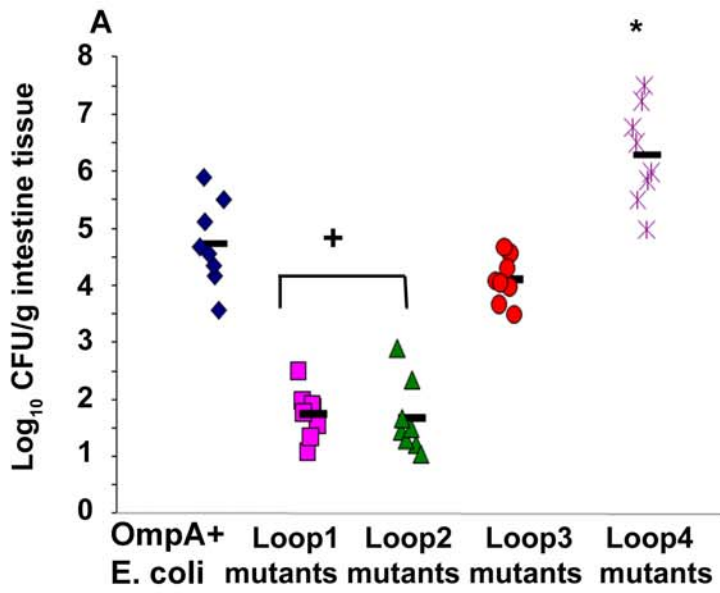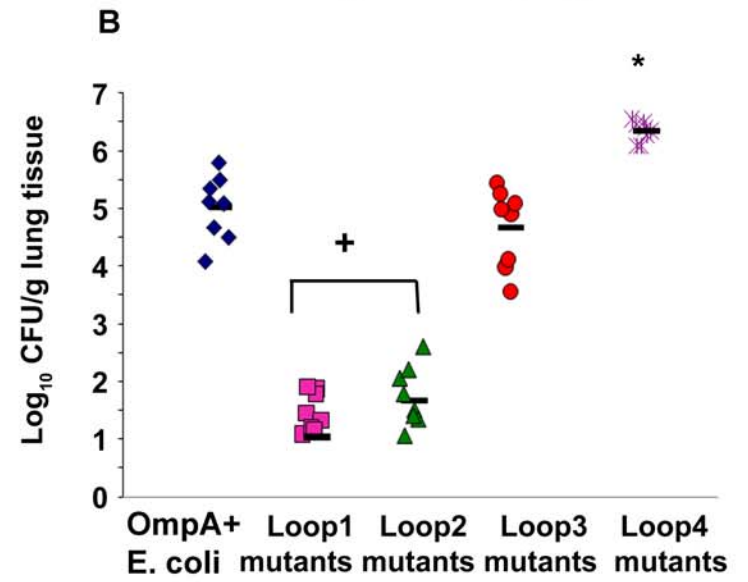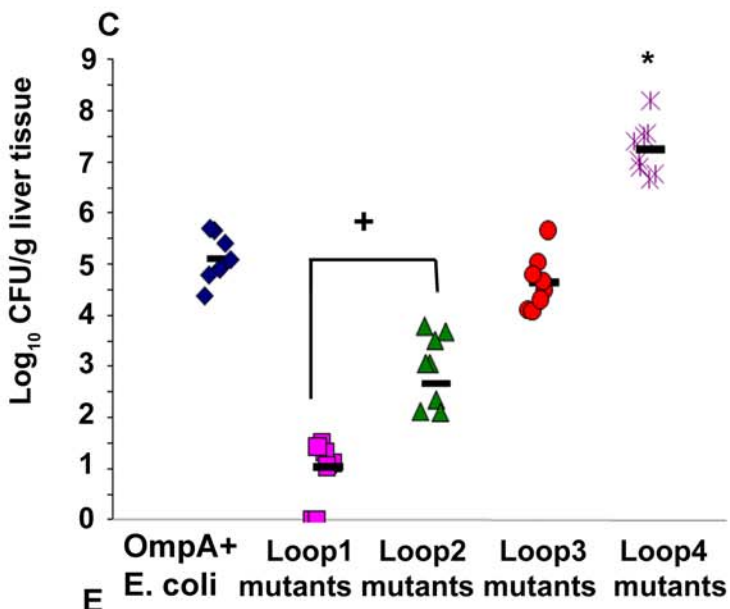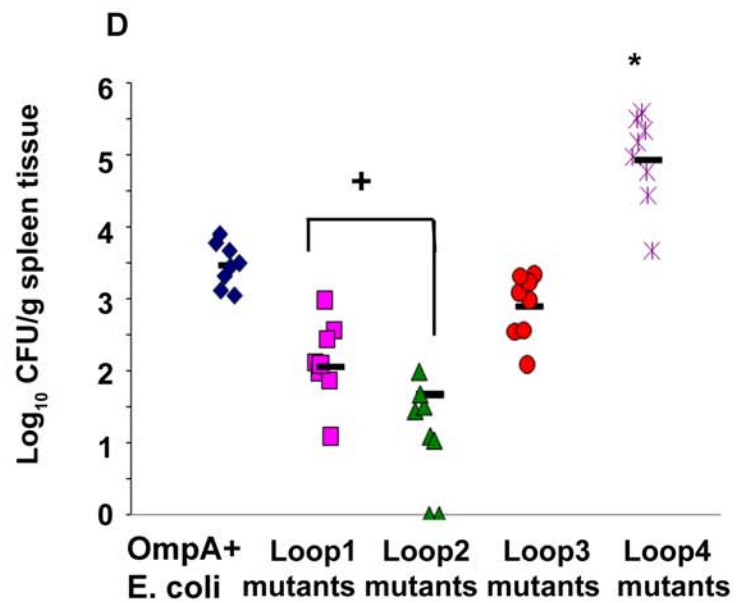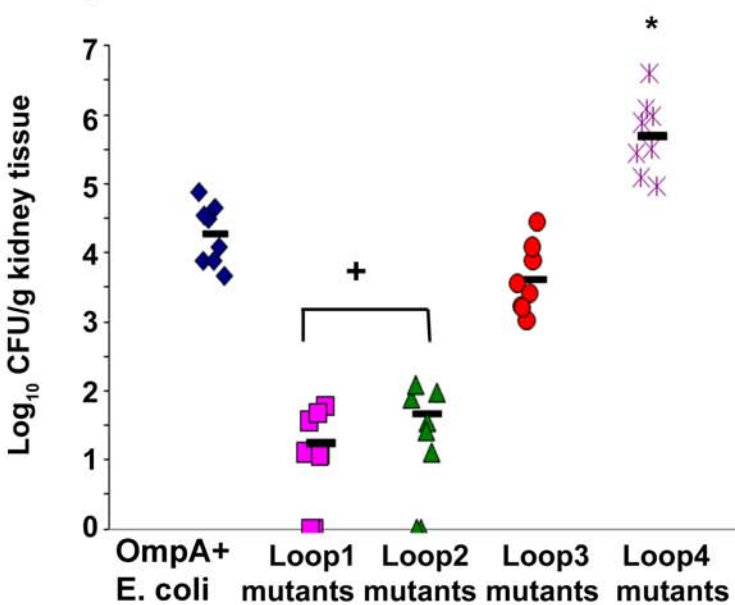

Supplement: supp_M110.178236_jbc.M110.178236-3.pdf [file supp_M110.178236_jbc.M110.178236-3.pdf]

Supplementary Figure 4

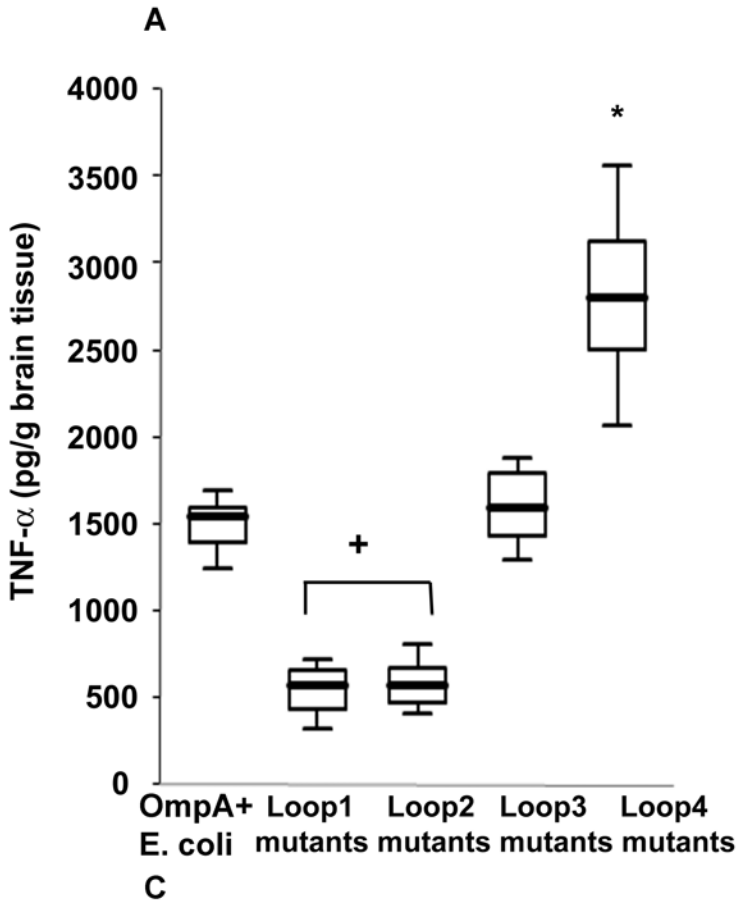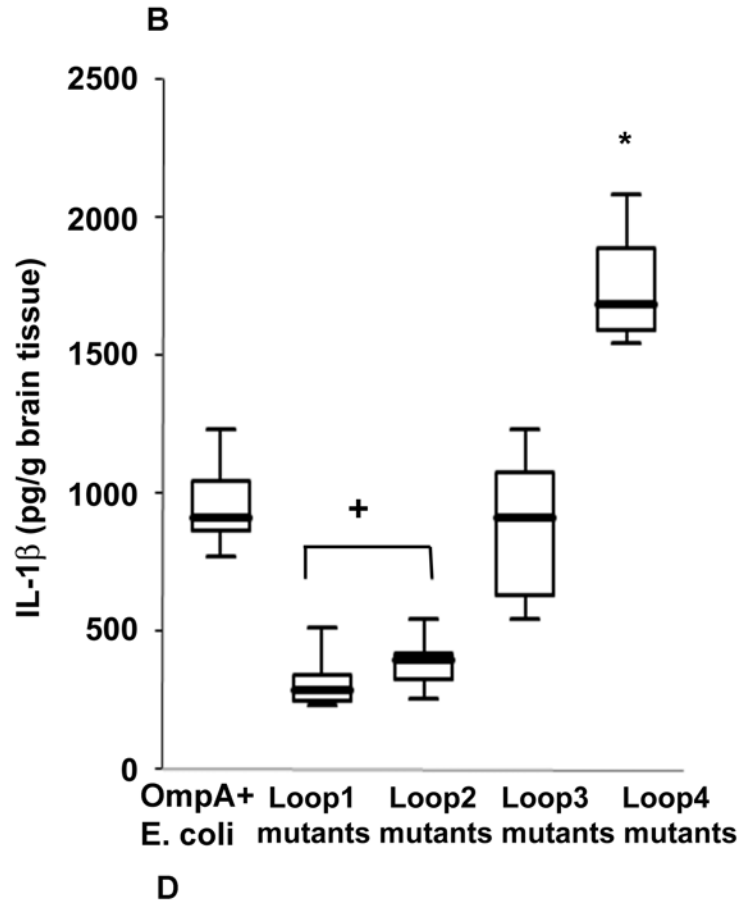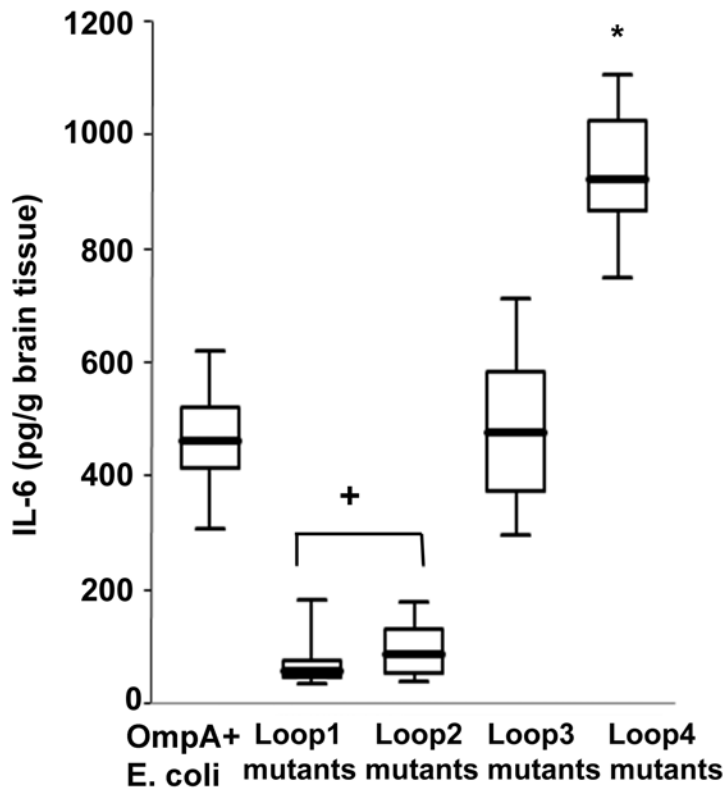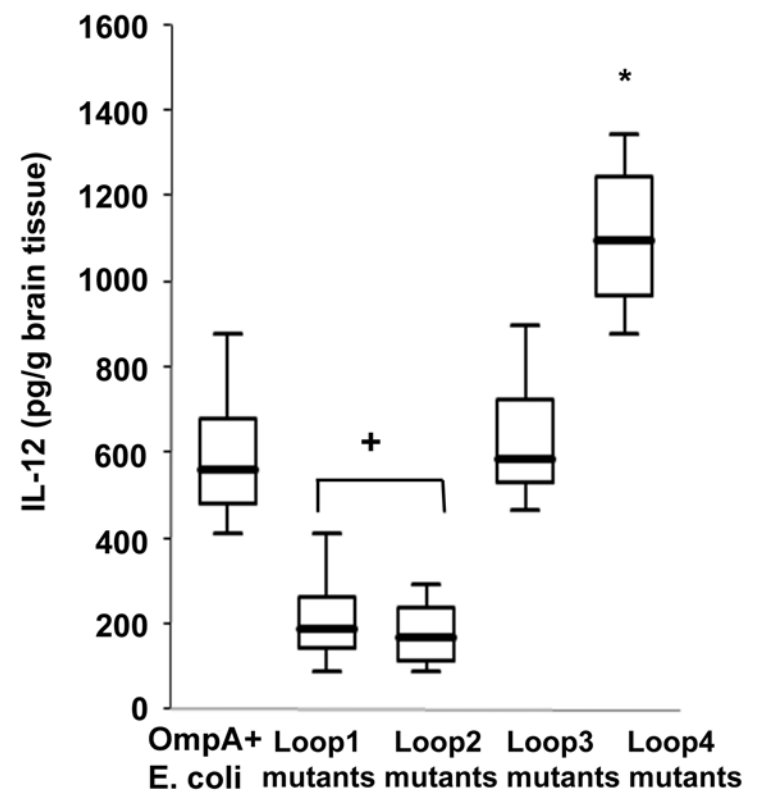

Supplement: supp_M110.178236_jbc.M110.178236-4.pdf [file supp_M110.178236_jbc.M110.178236-4.pdf]
